# Supplementary material
Source: PubMed Central journal article supplement (PMC3032481)
Supplement: pp.110.164640_1.pdf [file pp.110.164640_1.pdf]

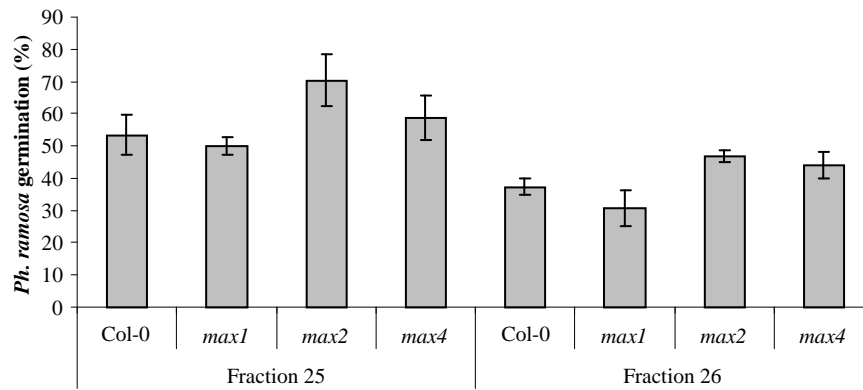

**Figure S1.** Germination of *Phelipanche ramosa* seeds induced by HPLC fractions 25 and 26 of *Arabidopsis* (Col-0, *max1-1*, *max2-1* and *max4-1*) root exudates. Bars represent the average of 3 independent biological replicates ± SE.

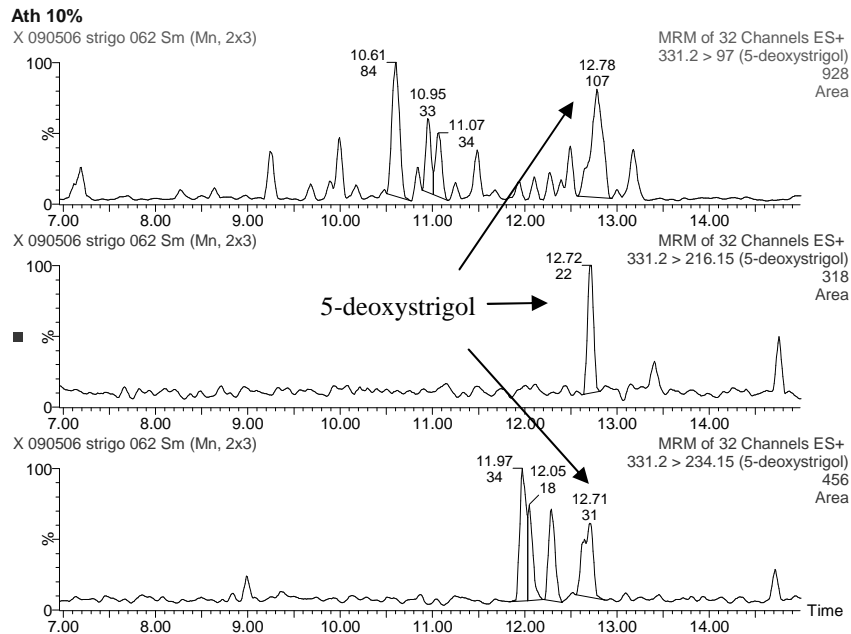

**Figure S2.** MRM-LC-MS/MS analysis of *Arabidopsis* root exudates from plants grown under phosphate starvation, showing transitions 331.2 > 97, 331.2 > 216.15 and 331.2 > 234.15 for 5-deoxystrigol.

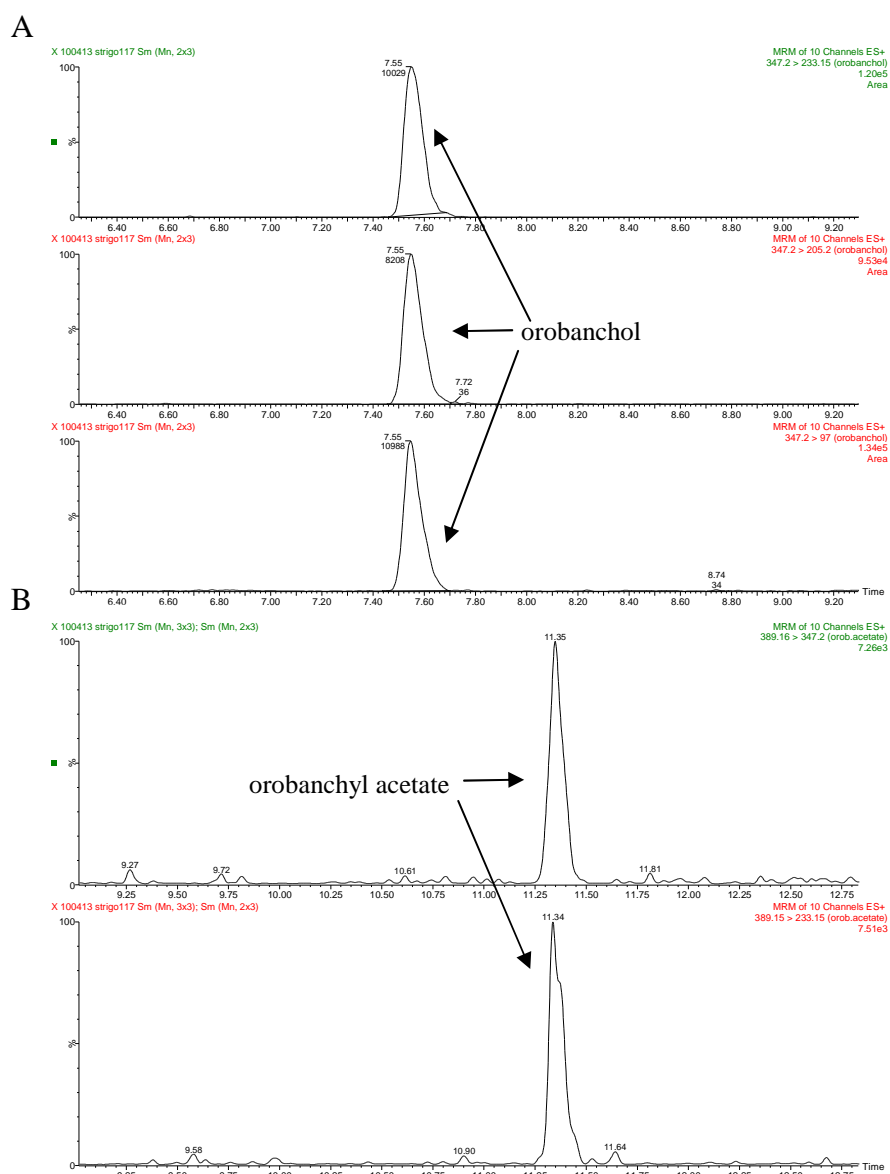

**Figure S3.** MRM-LC-MS/MS analysis of *Arabidopsis* root extracts from plants grown under phosphate starvation. A, showing transitions 347 > 233, 347 > 205 and 347 > 96.8 for orobanchol. B, showing transitions 389.2 > 233 and 389.2 > 347 for orobanchyl acetate

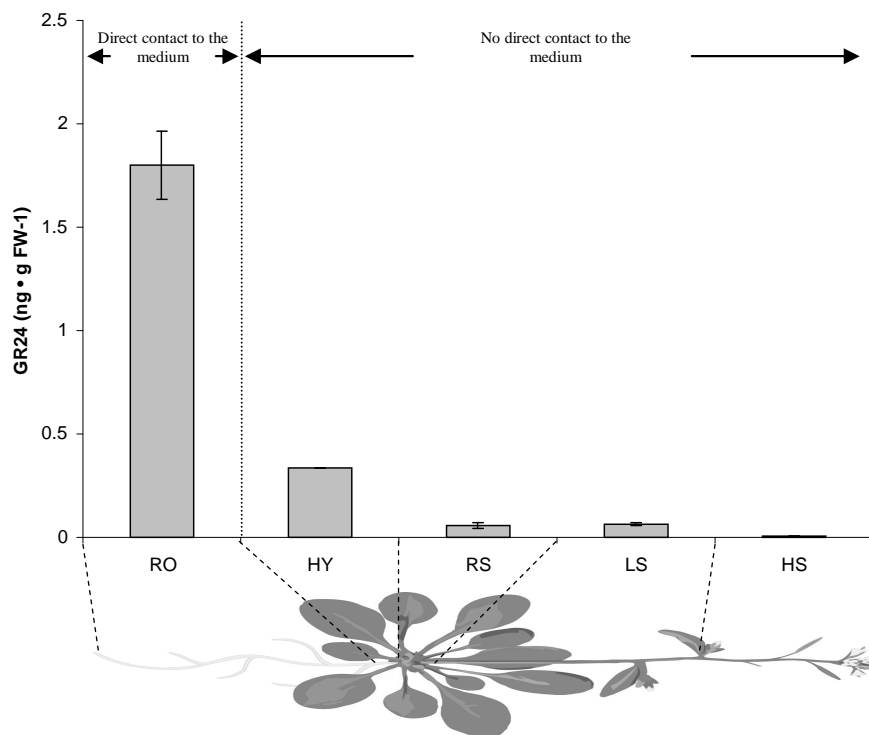

**Figure S4.** MRM-LCMS/MS analysis of GR24 uptake and accumulation by *Arabidopsis thaliana* tissues (RO = root system, HY = hypocotyl, RS = rosette stem, LS = lower stem and HS = higher stem).

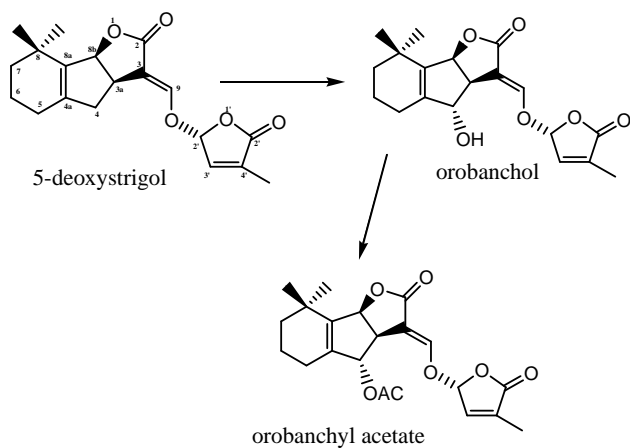

**Figure S5.** Postulated biosynthetic scheme for the strigolactones formation in *Arabidopsis* (modified from Rani et al., 2008)

**Table S1. HPLC fractioned strigolactone standards**

---

| <b>Strigolactone standard</b> | <b>HPLC fraction</b> |
|-------------------------------|----------------------|
| 7-hydroxyorobanchol           | 11                   |
| 7-oxoorobanchol               | 14                   |
| 7-hydroxyorobanchyl acetate   | 17                   |
| solanacol                     | 17                   |
| 7-oxoorobanchyl acetate       | 19                   |
| epiorobanchol                 | 20                   |
| orobanchol                    | 20                   |
| strigol                       | 20                   |
| sorgumol                      | 20                   |
| GR24                          | 22                   |
| orobanchyl acetate            | 26                   |
| sorgolactone                  | 27                   |
| 5-deoxystrigol                | 28                   |
